# Supplementary material for: Cost-Effectiveness Analysis from a Randomized Controlled Trial of Tailored Exercise Prescription for Women with Breast Cancer with 8-Year Follow-Up
Source: MDPI journal article supplement (doi:10.3390/ijerph17228608), 2020-11-19
Supplement: s1 [file s1]

# Supplementary File

Title: Cost-Effectiveness Analysis from a Randomized Controlled Trial of Tailored Exercise Prescription for Women with Breast Cancer with 8-Year Follow Up

**Table S1.** Detail of intervention delivery costs.

| Personnel                                                                | Details & Sources                                                                                                                                                                                                                                                                                   | Lower   | Average | Upper   |
|--------------------------------------------------------------------------|-----------------------------------------------------------------------------------------------------------------------------------------------------------------------------------------------------------------------------------------------------------------------------------------------------|---------|---------|---------|
| EP visits: AEP: Professional Staff, HEW 5, Level 3, casual (source: QUT) | \$45.77/hour, 20 hours/participant: includes exercise sessions 16 each, reporting, follow-up<br><a href="http://www2.qut.edu.au/jobs/working-at-qut/docs/Salary%20Scales%20Professional%20Staff.pdf">http://www2.qut.edu.au/jobs/working-at-qut/docs/Salary%20Scales%20Professional%20Staff.pdf</a> |         | 915.40  |         |
| Admin Staff : Professional Staff, HEW 4, Level 1, casual (source: QUT)   | \$39.57/hour, 3.5 hours/week for 16 weeks = 56 hours for 134 participants / estimated as 0.5–1 hour for per participant                                                                                                                                                                             | 19.79   | 29.68   | 39.57   |
| EP visits using MBS item(government as the payer)                        | 10 visits *item 10953*\$62.25 + care plan(721+723) *2                                                                                                                                                                                                                                               |         | 1139.60 |         |
| Intervention Materials                                                   | Details                                                                                                                                                                                                                                                                                             | Lower   | Average | Upper   |
| Workbook, Tracker, CMF (pack)                                            | Officework Printing service (2018) 1/participant<br><a href="https://www.officeworks.com.au/resources/pdfs/guides/print-and-copy_price-guide.pdf">https://www.officeworks.com.au/resources/pdfs/guides/print-and-copy_price-guide.pdf</a>                                                           |         |         |         |
| Educational Workbook                                                     | 54 colour pages on double sided 100 gsm, A4 \$0.23-\$0.69 per side                                                                                                                                                                                                                                  | 12.42   | 14.15   | 15.87   |
| Exercise Tracker                                                         | 2 colour pages on double sided 100 gsm, A4\$0.23-\$0.69 per side                                                                                                                                                                                                                                    | 0.46    | 0.92    | 1.38    |
| Case Management Folder                                                   | 33 black and white pages on double sided 100 gsm, A4 *\$0.04-\$0.10                                                                                                                                                                                                                                 | 1.32    | 2.31    | 3.3     |
| Total                                                                    |                                                                                                                                                                                                                                                                                                     | 14.20   | 17.38   | 20.55   |
| Resources and other                                                      | Details                                                                                                                                                                                                                                                                                             |         |         |         |
| Equipment/Clothes purchased by patients                                  | \$40.46 per patient / 8months * inflation Gordon et al. 2017                                                                                                                                                                                                                                        |         | 42.40   |         |
| Intervention delivery                                                    | Intervention delivery                                                                                                                                                                                                                                                                               |         |         |         |
| Office rental                                                            | \$10/sq m per week x 15 sq m for 8 months (34.66 weeks) * inflation from 2014 (4.97%) divided by 67 participants Gordon et al. 2017                                                                                                                                                                 |         | 81.32   |         |
| Mobile plan                                                              | Telephone calls for follow-up, reminders, etc. \$50-\$100 per month *8months/50 participants                                                                                                                                                                                                        | 8.00    | 12.00   | 16.00   |
|                                                                          | 2018                                                                                                                                                                                                                                                                                                | low     | 1322.38 | high    |
|                                                                          | CPI inflation to 2019 = 1.61% to bring to 2019 dollars with ±10% low and high values                                                                                                                                                                                                                | 1209.30 | 1343.67 | 1478.03 |

**Table S2.** Productivity losses, end-of-life healthcare costs, and out-of-pocket costs.

| Items                                                                                                                                                                                                                                                                  | Note                                                                                                                        | Costs       |                            |             |
|------------------------------------------------------------------------------------------------------------------------------------------------------------------------------------------------------------------------------------------------------------------------|-----------------------------------------------------------------------------------------------------------------------------|-------------|----------------------------|-------------|
|                                                                                                                                                                                                                                                                        |                                                                                                                             | Early stage | Locoregional<br>Recurrence | Metastasis  |
| Productivity losses - households / carers                                                                                                                                                                                                                              |                                                                                                                             |             |                            |             |
| Household work time loss—Hours worked by Household; hours worked prior to cancer diagnosis—post-treatment2016, Deloitte report ,Financial impacts of breast cancer in Australia                                                                                        |                                                                                                                             | 2.00        | 27.00                      | 52.00       |
| Household productivity loss (per week) Work time loss* average wage Locoregional is average of no recurrence (profile 1) and metastasis (profile 5)                                                                                                                    |                                                                                                                             | 79.77       | 1076.87                    | 2073.98     |
|                                                                                                                                                                                                                                                                        | Approx 90.9% of EfH participants were under 65 working age                                                                  | 72.51       | 978.88                     | 1885.25     |
|                                                                                                                                                                                                                                                                        | 74.5% of women are in the work force                                                                                        | 54.02       | 729.26                     | 1404.51     |
|                                                                                                                                                                                                                                                                        | 54.5% work FT                                                                                                               | 29.44       | 397.45                     | 765.46      |
|                                                                                                                                                                                                                                                                        | plus 45.5% work PT (assume 50%)                                                                                             | 41.73       | 563.36                     | 1084.98     |
| Households' productivity loss (annual )                                                                                                                                                                                                                                | 10%                                                                                                                         | \$2169.97   | \$29,294.54                | \$56,419.12 |
|                                                                                                                                                                                                                                                                        | Low 10%                                                                                                                     | \$1952.97   | \$26,365.09                | \$50,777.21 |
|                                                                                                                                                                                                                                                                        | High 10%                                                                                                                    | \$2386.96   | \$32,224.00                | \$62,061.04 |
| Average Salary\$1515.60/week ,full-time work load,2016 ABS #6306 <a href="https://www.abs.gov.au/AUSSTATS/abs@.nsf/Lookup/6306.0Main+Features1May%202018?OpenDocument">https://www.abs.gov.au/AUSSTATS/abs@.nsf/Lookup/6306.0Main+Features1May%202018?OpenDocument</a> | Average hourly rate=weekly rate/38 hour                                                                                     | 39.88       |                            |             |
| Productivity losses - Individuals                                                                                                                                                                                                                                      |                                                                                                                             |             |                            |             |
| Patients' productivity loss (hrs per week) Survivors: hours worked prior to cancer diagnosis - post-treatment; Recurrence: hours worked prior to cancer diagnosis - during treatment 2016, Deloitte report ,Financial impacts of breast cancer in Australia            | Survivors: Urban:28–16 = 14hours, Non-urban: 25–3 = 22 hours; Recurrence: Urban:28–0 = 28hours, Non-urban: 25–0 = 25 hours; | 10.00       | 21.00                      | 32.00       |
| Patients' productivity loss (annual) Work time loss* average wage Locoregional is average of no recurrence (profile 1) and metastasis (profile 5)                                                                                                                      |                                                                                                                             | 398.84      | 837.57                     | 1276.29     |
|                                                                                                                                                                                                                                                                        | Approx 90.9% of EfH participants were under 65 working age                                                                  | 362.55      | 761.35                     | 1160.15     |
| ABS 2020                                                                                                                                                                                                                                                               | 74.5% of women are in the work force                                                                                        | 270.10      | 567.21                     | 864.31      |

| Items                                                                                                                                                                                                                             | Note                                              | Costs       |              |              |
|-----------------------------------------------------------------------------------------------------------------------------------------------------------------------------------------------------------------------------------|---------------------------------------------------|-------------|--------------|--------------|
|                                                                                                                                                                                                                                   | 54.5% work FT                                     | 147.20      | 309.13       | 471.05       |
|                                                                                                                                                                                                                                   | plus 45.5% work PT (assume 50%)                   | 208.65      | 438.17       | 667.68       |
| Subtotal                                                                                                                                                                                                                          | 10%                                               | \$10,849.83 | \$22,784.65  | \$34,719.46  |
|                                                                                                                                                                                                                                   | Low 10%                                           | \$9764.85   | \$20,506.18  | \$31,247.51  |
|                                                                                                                                                                                                                                   | High 10%                                          | \$11,934.81 | \$25,063.11  | \$38,191.41  |
|                                                                                                                                                                                                                                   | Applies to less than 65 years old                 |             |              |              |
| <b>End-of-life healthcare costs</b>                                                                                                                                                                                               |                                                   | Average     | Lower        | Upper        |
| Last six months of life, these costs accrue, based on Australian data linkage study<br>Reeve et al. 2018 (adjusted to 2017 AUD)                                                                                                   | Cancer cohort                                     | \$25,475.47 | \$22,927.92  | \$28,023.02  |
|                                                                                                                                                                                                                                   | Comparison cohort - non cancer                    | \$12,122.00 | \$10,909.80  | \$13,334.20  |
| <a href="https://www.rba.gov.au/statistics/historical-data.html#exchange-rates">https://www.rba.gov.au/statistics/historical-data.html#exchange-rates</a>                                                                         | From 2010-2019RBA inflation calculator            | 19.8%       |              |              |
|                                                                                                                                                                                                                                   |                                                   |             | 10%          |              |
| <b>Lost income due to premature death</b>                                                                                                                                                                                         |                                                   | 2019        | Lower        | Upper        |
| Individual productivity loss Carter 2016                                                                                                                                                                                          | Applies to less than 65 years old                 | \$149,909   | \$134,918.46 | \$164,900.34 |
| <a href="https://www.rba.gov.au/calculator/annualDecimal.html">https://www.rba.gov.au/calculator/annualDecimal.html</a>                                                                                                           | RBA inflation calculator                          | 5.57%       |              |              |
| <b>Out of pocket costs due to breast cancer</b>                                                                                                                                                                                   |                                                   |             |              |              |
| Costs for two year period where most OOPs accrue, Deloitte Access Economics report 2016, found molecular profile did not sign change costs in stage I-III--2016, Deloitte report ,Financial impacts of breast cancer in Australia |                                                   | 2019        |              |              |
|                                                                                                                                                                                                                                   | 2 years                                           | \$5076.86   | \$1594.11    | \$18,158.04  |
|                                                                                                                                                                                                                                   | Convert to 1 year                                 | \$2538.43   | \$797.05     | \$9079.02    |
|                                                                                                                                                                                                                                   | This cost for 2 years then 25% of cost thereafter |             |              |              |

**Table S3.** Costs for recurrence of breast cancer.

|                                                                                                                                                                      | Probabil<br>ity | Costs   | Costs (2018<br>AUD) | Total<br>Costs  | Sources              |                       |
|----------------------------------------------------------------------------------------------------------------------------------------------------------------------|-----------------|---------|---------------------|-----------------|----------------------|-----------------------|
| Local Recurrence                                                                                                                                                     |                 |         |                     |                 |                      |                       |
| Inpatient major surgical procedure AR-DRG(6393.00)                                                                                                                   | 100%            | 6393    | 7160.16             | 7160.16         | Verry et al.<br>2012 | Inflated<br>2011–2018 |
| Radiotherapy (13%)- 13% of local recurrence patients receive radiotherapy                                                                                            | 13%             | 5171.75 | 5792.36             | 753.0068        |                      |                       |
| Radiotherapy costs include an initial and follow-up consultation, computed tomography planning and megavoltage – three fields (breast, boost and axilla) for 6 weeks |                 |         |                     |                 |                      |                       |
| Specialist visits *4 - item 104(85.55)*4                                                                                                                             | 100%            |         | 342.2               | 342.2           |                      |                       |
| GP visits*4 - item 36(71.7)*4                                                                                                                                        | 100%            |         | 286.8               | 286.8           |                      |                       |
| Total                                                                                                                                                                |                 |         |                     | 8542.1668       | Lower                | Upper                 |
|                                                                                                                                                                      |                 |         | 2018 to 2019        | \$8678.84       | \$7810.96            | \$9546.73             |
| Distant metastases (annual)                                                                                                                                          |                 |         |                     |                 |                      |                       |
| Inpatient procedure*3 (70%) 70% receive procedure                                                                                                                    | 70%             | 5190.33 | 5813.1696           | 12207.656<br>16 |                      |                       |
| Third-generation chemotherapy (100%)(MBS, PBS)                                                                                                                       | 100%            | 5419.06 | 6069.3472           | 6069.3472       |                      |                       |
| Fourth-generation chemotherapy (50%)50% receive                                                                                                                      | 50%             | 15172.3 | 16992.9872          | 8496.4936       |                      |                       |
| Specialist visits*2- item 104(85.55)*2                                                                                                                               | 100%            |         | 171.1               | 171.1           |                      |                       |
| GP visits *4 - item 36(71.7)*4                                                                                                                                       | 100%            |         | 286.8               | 286.8           |                      |                       |
| Total                                                                                                                                                                |                 |         |                     | 27231.396<br>96 | Lower                | Upper                 |
|                                                                                                                                                                      |                 |         |                     | \$27,667.10     | \$24,900.39          | \$30,433.81           |

**Table S4.** Follow-up schedule.

| Frequency         |             | Costs |         |       |
|-------------------|-------------|-------|---------|-------|
|                   |             | lower | medium  | upper |
| Year 1–2          |             |       |         |       |
| Specialist Visits | 3–6 months  | 171.1 | 256.65  | 342.2 |
| GP visits         | 3–6 months  | 143.4 | 215.1   | 286.8 |
| Mammography       | annually    | 71.6  | \$89.50 | 107.4 |
| Total             |             | 386.1 | 561.25  | 736.4 |
| Year 3–5          |             |       |         |       |
| Specialist Visits | 6–12 months | 85.55 | 128.325 | 171.1 |
| GP visits         | 6–12 months | 71.7  | 107.55  | 143.4 |

|                   |          |        |         |        |
|-------------------|----------|--------|---------|--------|
| Mammography       | annually | 71.6   | \$89.50 | 107.4  |
| Total             |          | 228.85 | 325.375 | 421.9  |
| After year 5      |          |        |         |        |
| Specialist Visits | annually | 68.44  | 85.55   | 102.66 |
| GP visits         | annually | 57.36  | 71.7    | 86.04  |
| Mammography       | annually | 71.6   | \$89.50 | 107.4  |
| Total             |          | 197.4  | 246.75  | 296.1  |

**Table S5.** Probability of local and distant recurrence.

|                                      | Prob         | Rate            | 1-year prob | 10% low         | 10% high        | Source                                                              |
|--------------------------------------|--------------|-----------------|-------------|-----------------|-----------------|---------------------------------------------------------------------|
| Local Recurrence - 6.9year follow-up | 0.04411<br>8 | 0.00653919<br>4 | 0.0065179   | 0.00586607<br>4 | 0.00716964<br>5 | Wu et al. 2016; retrospective, 1088 records, 6.9y follow-up, Canada |
| Distant Recurrence 6.9year follow-up | 0.11580<br>9 | 0.01783796<br>8 | 0.017680    | 0.01591183<br>2 | 0.01944779<br>4 |                                                                     |

**Table S6.** Probability of locoregional disease progressing to distant disease.

|                           | Disease free prob | Prog prob | Rate        | 1-year prob | 10% low  | 10% high | Sources       |
|---------------------------|-------------------|-----------|-------------|-------------|----------|----------|---------------|
| Positive nodes            | 0.514             | 0.486     | 0.133106403 | 0.124628    | 0.112165 | 0.137091 | Wapnir 2006   |
| Negative nodes            | 0.669             | 0.331     | 0.080394244 | 0.077248    | 0.069523 | 0.084972 | Anderson 2009 |
| 57% had negative in study | 0.5915            | 0.4085    | 0.105018719 | 0.099692    | 0.089723 | 0.109662 |               |

**Table S7.** Survival rates from breast cancer by stage.

|                                 | Survival Prob | Mortality Prob | Rate            | 1-year Prob | 10% low      | 10% high | Sources                                                                                                                                                        |
|---------------------------------|---------------|----------------|-----------------|-------------|--------------|----------|----------------------------------------------------------------------------------------------------------------------------------------------------------------|
| Locoregional Recurrence—10 year | 49.0%         | 51.000%        | 0.07133498<br>9 | 0.068850    | 0.06196<br>5 | 0.075735 | Witteveen et al. paper; Netherland;2014<br><a href="https://seer.cancer.gov/statfacts/html/breast.html">https://seer.cancer.gov/statfacts/html/breast.html</a> |
| Distant Recurrence—5 year       | 27.0%         | 73.000%        | 0.26186666<br>4 | 0.230386    | 0.20734<br>8 | 0.253425 |                                                                                                                                                                |

**Table S8.** Mortality and recurrence rates for exercise and usual care groups (source EfH trial).

| RR for exercise program Survival (measured by mortality) | EfH results | 8-year probability | Rate        | 1-year probability |
|----------------------------------------------------------|-------------|--------------------|-------------|--------------------|
| Overall mortality—usual care                             | 15/130      | 0.115384615        | 0.014771364 | 0.014663           |
| Overall mortality—exercise                               | 11/207      | 0.053140097        | 0.006578811 | 0.006557           |
| Non-breast cancer Death—Usual Care                       | 5/130       | 0.038461538        | 0.004725387 | 0.004714           |

|                                                                 |             |                    |             |                    |
|-----------------------------------------------------------------|-------------|--------------------|-------------|--------------------|
|                                                                 | low 95% CI  | 0.0126             | 0.001527717 | 0.001527           |
|                                                                 | high 95% CI | 0.0875             | 0.011032192 | 0.010972           |
| Non-breast cancer Death—Exercise                                | 1/207       | 0.004830918        | 0.000583449 | 0.000583           |
|                                                                 | low 95% CI  | 0.0001             | 1.20488E-05 | 0.000012           |
|                                                                 | high 95% CI | 0.0266             | 0.003248215 | 0.003243           |
| Breast cancer Death—Usual Care                                  | 10/130      | 0.076923077        | 0.009643700 | 0.009597           |
|                                                                 | low 95% CI  | 0.0375             | 0.004604965 | 0.004594           |
|                                                                 | high 95% CI | 0.1369             | 0.017737918 | 0.017582           |
| Breast cancer Death—Exercise                                    | 10/207      | 0.048309179        | 0.005965670 | 0.005948           |
|                                                                 | low 95% CI  | 0.0234             | 0.002852786 | 0.002849           |
|                                                                 | high 95% CI | 0.087              | 0.010966193 | 0.010906           |
| Applied in model up to 8 years thereafter usual all cause death |             |                    |             |                    |
|                                                                 |             |                    | 7.96154     | 2.074622255        |
| <b>Recurrence rates between Exercise and UC groups</b>          |             |                    |             |                    |
| Disease free survival                                           |             | 8-year probability | Rate        | 1-year probability |
| Recurrence—Exercise group                                       | 12/207      | 0.057971014        | 0.007195089 | 0.007169           |
|                                                                 | low 95% CI  | 0.0303             | 0.003707052 | 0.003700           |
|                                                                 | high 95% CI | 0.0991             | 0.012573616 | 0.012495           |
| Recurrence—Usual care                                           | 8/130       | 0.061538462        | 0.007652218 | 0.007623           |
|                                                                 | low 95% CI  | 0.0269             | 0.003285353 | 0.003280           |
|                                                                 | high 95% CI | 0.1177             | 0.015087126 | 0.014974           |

**Table S9. Probability of death by age (female)** <https://www.abs.gov.au/AUSSTATS/abs@.nsf/DetailsPage/3302.0.55.0012016-2018?OpenDocument>.

| Age | Prob Death  | Age | Prob Death  | Age | Prob Death  | Age | Prob Death  |
|-----|-------------|-----|-------------|-----|-------------|-----|-------------|
| 0   | 0.003025414 | 25  | 0.000239971 | 50  | 0.001788399 | 75  | 0.016630166 |
| 1   | 0.000229974 | 26  | 0.000259966 | 51  | 0.001968061 | 76  | 0.018594941 |
| 2   | 0.000119993 | 27  | 0.000269964 | 52  | 0.002127733 | 77  | 0.020937698 |
| 3   | 0.000099995 | 28  | 0.000279961 | 53  | 0.002307334 | 78  | 0.023724053 |
| 4   | 0.000089996 | 29  | 0.000299955 | 54  | 0.002496878 | 79  | 0.02677502  |
| 5   | 0.000079997 | 30  | 0.000329946 | 55  | 0.002686385 | 80  | 0.030369298 |
| 6   | 0.000069998 | 31  | 0.000369932 | 56  | 0.002875857 | 81  | 0.034635955 |
| 7   | 0.000059998 | 32  | 0.00039992  | 57  | 0.0030952   | 82  | 0.039527569 |
| 8   | 0.000059998 | 33  | 0.000429908 | 58  | 0.003374294 | 83  | 0.045063087 |
| 9   | 0.000059998 | 34  | 0.000479885 | 59  | 0.00365331  | 84  | 0.051724304 |
| 10  | 0.000059998 | 35  | 0.000519865 | 60  | 0.003982051 | 85  | 0.059101491 |
| 11  | 0.000069998 | 36  | 0.000549849 | 61  | 0.004310682 | 86  | 0.067298439 |
